# Supplementary material for: Increased Prevalence of Autoimmune Gastritis in Patients with a Gastric Precancerous Lesion
Source: MDPI journal article supplement (doi:10.3390/jcm12196152), 2023-09-23
Supplement: s1 [file s1]

## Supplementary

**Table S1. Detailed clinical findings of APCA positive cases.**

| Characteristics                               | Autoimmune gastritis (N = 46) |
|-----------------------------------------------|-------------------------------|
| <b>Diagnosis of H. pylori infection</b>       |                               |
| ≥ 30 EIU / < 30 EIU                           | 18/28 (39.1%/60.9%)           |
| <b>Associated disorders</b>                   |                               |
| Hashimoto's thyroiditis, N (%)                | 7 (15.2%)                     |
| Graves' disease, N (%)                        | 2 (4.3%)                      |
| Rheumatoid arthritis, N (%)                   | 2 (4.3%)                      |
| Low Vitamin B12, N (%) *                      | 25 (54.3%)                    |
| Pernicious anemia, N (%) †                    | 7 (15.2%)                     |
| <b>Associated pathology feature</b>           |                               |
| Enterochromaffin-like cell hyperplasia, N (%) | 19 (41.3)                     |

\*Low vitamin B12 were defined as vitamin B12 < 400 pmol/L

†Vitamin B12 deficiency were defined as vitamin B12 < 145 pmol/L

## Supplementary Figure S1

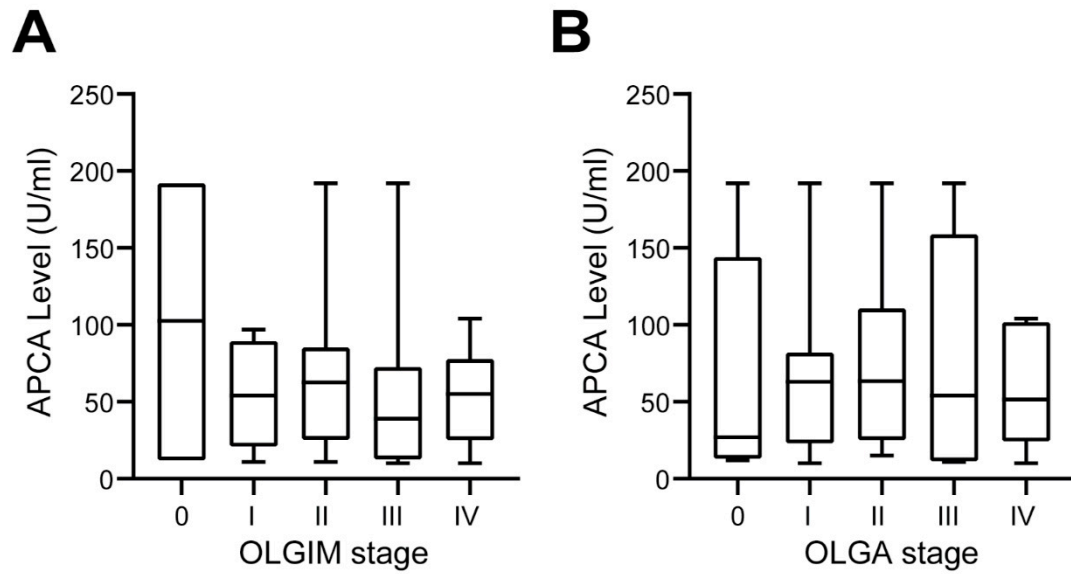

**Supplementary Figure S1.** Serum concentration of APCA did not correlate with the worst OLGIM score detected during longitudinal follow-up (A,  $r=-0.1$ ;  $p=0.39$ ) or the worst OLGA stage (B,  $r=0.01$ ;  $p=0.96$ ).
